1 **A new multi-species Protein A-ELISA assay for plague diagnosis in humans and**  
2 **other mammal hosts**

3

4 Matheus Filgueira Bezerra<sup>1§</sup>, Camila Cavalcanti Xavier<sup>1§</sup>, Alzira Maria Paiva de  
5 Almeida<sup>1&</sup> and Christian Robson de Souza Reis<sup>1&\*</sup>

6 <sup>1</sup>Departamento de Microbiologia – Instituto Aggeu Magalhães; Fiocruz-PE. Recife, PE,  
7 Brazil;

8 <sup>§</sup>These authors contributed equally to this work

9 <sup>&</sup>These authors contributed equally to this work

10

11 **Running title:** Protein A-ELISA method for multi-species plague diagnosis

12

13

14

15 \* Corresponding author: Christian R S Reis;

16 Av. Professor Moraes Rego, s/n, Recife/PE 50740-465, Brazil. Tel: +55-81-21012677.

17 Email: [christian.reis@fiocruz.br](mailto:christian.reis@fiocruz.br)

18

19 **Paper type:** Full length article

20 **Text word count:** 2819

21 **Abstract text count:** 200

22 **Number of figures:** 3

23 **Number of tables:** 2

24 **Number of references:** 27

25 **Number of Supplemental data:** 4

NOTE: This preprint reports new research that has not been certified by peer review and should not be used to guide clinical practice.

26 **Abstract**

27 **Background.** The Hemagglutination assay (HA) is widely used in plague diagnosis,  
28 however, it has a subjective interpretation and demands high amounts of antigen and other  
29 immunobiological supplies. Conventional IgG-ELISA is limited by the need of specific  
30 conjugates for multiple plague hosts.

31 **Methods.** Thus, we developed an ELISA Protein A-peroxidase method to detect anti-F1  
32 antibodies across several species, including humans. To determine the cut-off and  
33 performance rates, HA results from 288 samples (81 rabbits, 64 humans, 66 rodents and  
34 77 dogs) were used as reference.

35 **Results.** Optimal conditions were found with 250ng/well of F1 and 1:500 serum dilution.  
36 Protein A-ELISA showed high repeatability and reproducibility. The positive/negative  
37 OD ratios were higher in Protein A-ELISA and there was no significant cross-reaction  
38 with other pathogenic yersiniae. The overall sensitivity/specificity, area under the curve  
39 and Kappa rates for Protein A-ELISA were 93.9/98.9%; 0.993 and 0.938, respectively.  
40 Similar results were observed in each species separately. There was a strong agreement  
41 between Protein A and IgG assays ( $\kappa=0.973$ ) in independent analysis (n=487).

42 **Conclusions.** Altogether, the Protein A-ELISA showed high performance when  
43 compared both to HA and IgG-ELISA, with a polyvalent single protocol that requires  
44 reduced amounts of antigen and can be employed to any plague hosts.

45 **Keywords: ELISA, protein A, plague, diagnosis.**

46

47

48

49

50

## 51 INTRODUCTION

52 Plague is a flea-transmitted disease caused by the gram-negative bacterium  
53 *Yersinia pestis* and was responsible for at least three pandemics in the past [1]. Although  
54 nowadays plague can be treated with antibiotics, there is a lack of vaccines able to provide  
55 long-term immunity and this disease still threaten individuals living in remote places,  
56 close to wildlife hosts but distant from specialized healthcare services [2]. Human cases  
57 and deaths are recorded annually in several countries across Africa, Asia and the  
58 Americas [3]. Despite the declining incidence worldwide, the interest in plague is  
59 constant because of its potential to establish new epidemics and application as a biological  
60 weapon [2,4].

61 Although the rodents are the main plague reservoir, practically any mammal can  
62 be infected by *Y. pestis* and may take part in the dynamics of the infection [5]. An  
63 interesting feature of plague is that, under certain conditions, the disease is able to remain  
64 quiescent in the natural foci for decades and eventually reemerge among the wild fauna  
65 and spillover to human populations [6,7,8]. Due to this unique feature, it is of utmost  
66 importance to perform continuous monitoring of plague areas. In this regard, serological  
67 methods are an important surveillance tool, as it identifies not only animals with the active  
68 form of the disease, but also those previously exposed [9]. Most serological tests for  
69 plague are based on the detection of antibodies against the F1 capsular antigen, which is  
70 exclusive to *Y. pestis*, and highly immunogenic for humans and other mammals [10,11].

71 Given its polyvalence for sera from all taxonomic family groups,  
72 hemagglutination (HA) has been widely used for plague serological diagnosis for several  
73 decades. However, some commonly observed problems in HA, such as interpretations  
74 bias, cross-reaction with other infections, high consumption of F1 antigen and use of  
75 perishable biological supplies, led many laboratories to migrate to IgG ELISA tests [12-

76 16]. On the other hand, conventional ELISA requires a specific anti-IgG conjugate and  
77 different optimization for each mammal species. Thus, there is a need of new diagnostic  
78 methods that can improve the diagnosis and epidemiological surveillance of human and  
79 animal plague across the globe [2,4,17].

80 Alternatively to immunoglobulin (anti-IgG) conjugates, the *Staphylococcus*  
81 *aureus* protein A has been proposed for diagnosis of other multi-host diseases due to its  
82 universal affinity for immunoglobulins from various species of domestic and wild  
83 mammals [18-20]. To tackle this gap, we proposed a Protein A-based indirect ELISA  
84 method, able to detect anti-F1 antibodies from humans and other plague hosts within a  
85 single protocol.

86

## 87 **METHODS**

### 88 **F1 production**

89 The F1 antigen was extracted from the A1122 *Y. pestis* strain, according to the  
90 protocol described by Chu [10], in a Biosafety level 3 facility. The purified product was  
91 then mixed with 2× Laemmli buffer (1:1) containing 5% β-mercaptoethanol, heated at  
92 100 °C for five minutes and loaded onto a 20% polyacrylamide gel (Figure 1A). The F1  
93 antigen was quantified using the NanoDrop One<sup>C</sup> Microvolume UV-Vis  
94 Spectrophotometer (Thermo-Fischer, USA).

95

### 96 **Human and animal samples.**

97 Initially, 288 sera (81 control rabbits, 64 humans, 66 wild rodents and 77 domestic  
98 dogs; total positives/negatives = 98/190) with well-characterized results for HA were  
99 used for cut-off determination and Protein A-ELISA validation. Next, 265 additional  
100 samples with unknown HA results nor used in cut-off determination were included to

101 evaluate the agreement between the Protein A and IgG methods in ELISA. All sera were  
102 kindly provided by the Brazilian Plague Reference Service (SRP) and originated from the  
103 routine surveillance of the Brazilian plague areas including human cases, several rodent  
104 species and domestic carnivores (stray dogs) that prey on rodents [21,22].

105

### 106 **Rabbit immunization**

107 Sera from rabbits immunized with formol-killed *Y. pestis* and other pathogenic  
108 *Yersinia* strains (whole-cells immunization) or with the purified F1 antigen, produced as  
109 previously described [23] for positive control in routine diagnosis and were kindly  
110 provided by the SRP. From the 37 positive control sera, 14 were from rabbits exposed to  
111 the reference EV76 or A1122 *Y. pestis* strains in independent experiments, 18 were from  
112 rabbits exposed to diverse Brazilian *Y. pestis* strains from the Fiocruz-CYP  
113 (<http://cyp.fiocruz.br>) bacterial cultures collection and five were from rabbits exposed to  
114 the purified F1 antigen (three native F1 and two recombinant F1, expressed in *E. coli*)  
115 [23]. Additionally, to evaluate whether the ELISA test would present cross-reaction with  
116 other *Yersinia*e, five rabbits immunized with distinct isolates of *Yersinia*  
117 *pseudotuberculosis* and two with *Yersinia enterocolitica* were included. The other 37  
118 negative control rabbit sera were obtained from animals from the IAM facilities that did  
119 not underwent any experimental intervention.

120

### 121 **Ethics Statement**

122 The production of immune sera for positive controls in rabbits is routinely  
123 produced following the local Animal Ethics Committees (CEUA/IAM) guidelines and  
124 supplies the laboratorial diagnosis of plague by the National Plague Reference Service  
125 (SRP-IAM). Sera from rodents, dogs and humans were obtained during the routine

126 operations of the Brazilian plague surveillance program over the years and maintained in  
127 the serum samples collection of the Instituto Aggeu Magalhães.

128

### 129 **Protein A-ELISA and IgG-ELISA.**

130 The ELISA tests were adapted from previously established protocols [10,13].  
131 Briefly, 96-well plates (Techno Plastic Products, Switzerland) were incubated overnight  
132 with 250 ng of F1 diluted in 100 µl of a 0,05 M, pH 9,6 carbonate-bicarbonate buffer per  
133 well. Next, the plates were washed twice with 500 µl of PBS per well (PW 40 Microplate  
134 Washer, Bio-Rad, USA) and blocked with 100 µl of a 10% solution of low-fat milk in  
135 PBS for one hour. After a double wash with 500 µl of PBS-T (Tween 20, 0.05%), 100 µl  
136 of serum samples diluted (1:500) in a 10% milk/PBS-T solution were incubated in the  
137 plate at room temperature for one hour and washed twice with 500 µl of PBS-T. A 100  
138 µl of Protein A–Peroxidase from *Staphylococcus aureus*/horseradish (Sigma-Aldrich,  
139 USA) or goat anti-human, rabbit or dog-peroxidase (Kirkegaard & Perry Laboratories,  
140 USA) diluted in 10% milk/PBS-T solution (1:10.000 and 1:2.500, respectively) were  
141 added and incubated at room temperature for one hour and washed twice with 500 µl of  
142 PBS-T. Finally, 150 µl of 2 mg/mL OPD (o-phenylenediamine dihydrochloride; Sigma–  
143 Aldrich) and 1:10<sup>3</sup> H<sub>2</sub>O<sub>2</sub> diluted in citrate-phosphate buffer (pH=5.0) was incubated in  
144 each well for 30 minutes at room temperature in a dark environment. The reaction was  
145 stopped by the addition of 100 µl 2.5 M sulfuric acid (H<sub>2</sub>SO<sub>4</sub>) per well and plates were  
146 read at the optical density of 490nm (iMark™ Microplate Absorbance Reader, Bio-Rad,  
147 USA).

148 All samples were measured in triplicates and the background (blank) optical  
149 density (OD) from each plate was subtracted from the average sample OD. Distinct  
150 concentrations of F1 antigen, peroxidase conjugates and sera dilution were tested to

151 determine optimal conditions. The cut-offs were determined according to the best  
152 specificity/sensitivity (Youden's index) from the ROC curve. A distinct cut-off was  
153 calculated for each peroxidase conjugate. Since the rodent samples included rather  
154 heterogeneous range of wild species [21], we could not test them for IgG-ELISA.

155

### 156 **Hemagglutination assay (HA)**

157 The hemagglutination (HA) assay was performed as described previously [10]. In  
158 short, the F1 antigen was immobilized onto sheep red blood cells (SRBC) previously  
159 fixed with glutaraldehyde and tannic acid. Next, the F1-coated SRBC (25  $\mu$ L/well) were  
160 incubated with the test serum serially diluted in eight wells starting from 1/4 in HA  
161 (0.85% saline + normal rabbit serum) buffer. The specificity of HA was accessed by the  
162 hemagglutination inhibition (HI). The test is considered positive when the HA endpoint  
163 is depressed by three or more HI dilutions (titers  $> 1/16$  are considered positive).

164

### 165 **Statistical Analysis**

166 The HA test, which is routinely used in the SRP, was used as the gold standard to  
167 calculate Protein-A ELISA and IgG ELISA performance rates. Sensitivity, specificity,  
168 accuracy and confidence intervals were calculated using the <https://www.medcalc.org>  
169 platform. Receiver Operating Characteristic (ROC) curves, area under the curve (AUC),  
170 scatterplots and correlations were calculated with the GraphPad Prism version 5 software.  
171 Pearson test was used to measure the correlation between ODs from distinct tests and  
172 Mann-Whitney test was used to compare OD means. The intra and inter-assay variability  
173 was measured using the coefficient of variation (CV) from one serum from a rabbit  
174 immunized with the A1122 *Y. pestis* strain and one negative rabbit serum. Samples were  
175 tested in eight replicates within runs and across six experiments in non-consecutive days.

176 The Kappa test was initially applied to determine the agreement rate between the  
177 ELISA and HA tests (n=288) and then, between Protein A-ELISA and IgG-ELISA  
178 (n=487). The index was calculated using the Quickcalc Graphpad tool  
179 (<https://www.graphpad.com/quickcalcs/kappa2>). Statistical tests were applied with a  
180 95% confidence interval.

181

182

183

## 184 **RESULTS**

### 185 **Standardization of Protein A-ELISA and IgG-ELISA**

186 The optimal conditions were determined for Protein A-ELISA by evaluating  
187 separately distinct amount of F1 antigen per well and serum dilutions. There was no  
188 significant difference between the ODs by using the amounts of 250, 375 and 500 ng per  
189 well (Figure 1B). Thus, we decided to establish the lowest amount (250 ng per well) for  
190 the subsequent experiments. By testing three serum dilutions (1: 250; 1: 500 and 1: 1000),  
191 the 1:500 dilution showed high ODs for positive samples and low background for  
192 negative samples (Figure 1C). For optimization of the three IgG-ELISA tests, we  
193 maintained the amount of F1 antigen (250 ng/well) and sera dilution (1:500) previously  
194 established for Protein A-ELISA and tested four dilutions for IgG conjugate (1:1250;  
195 1:2500; 1:5000 and 1:10000). We found the best positive/negative ratios at the 1:2.500  
196 dilutions for all IgG conjugates (Supplementary Figure 1).

197

### 198 **Comparing ODs, cut-offs and cross-reaction between Protein A and IgG ELISAs**

199 Whilst a single cut-off was established for Protein A-ELISA considering the best  
200 Youden's index possible across all tested species, individual cut-offs were established for



201 IgG anti-rabbit, anti-human and anti-dog ELISAs (Table 1 and Figure 3 A-B). We  
202 observed low background signals in negative samples for Protein A, anti-rabbit and anti-  
203 human IgG conjugates, but a rather marked background in anti-dog IgG conjugate,  
204 resulting in a narrower window of opportunity for cut-off.

205 Overall, the average ODs from positive samples were significantly higher than the  
206 ODs from negative samples both in protein A and in IgG tests (Mann-Whitney test  $p <$   
207  $10^{-3}$ ). The ratios between the OD means from positive and negative samples were  
208 considerably higher for the protein A conjugate (all samples = 28.7; rabbit = 81.1; human  
209 = 34.2; rodent = 51.7 and dog = 12.8), when compared to anti-rabbit (22.4), anti-human  
210 (11.8) and anti-dog (4.9) IgG conjugates. OD ratios and averages are shown in Table 1  
211 and Supplementary Table 1, respectively.

212 We observed a good degree of correlation between ODs from Protein A and IgG-  
213 ELISA methods (Figure 2A). The mean ODs across six assay runs in different days were  
214 1,392 ( $\pm 0,069$ ) for the positive rabbit serum (A1122) and 0,046 ( $\pm 0,005$ ) for the negative  
215 control, with a coefficient of variation (CV) of 4.9% and 10.8%, respectively. The  
216 repeatability, determined by eight intra-assay replicates, showed a CV of 0.5% for the  
217 positive anti-*Y. pestis* A1122 serum and 4.6% for the negative serum. Moreover, the intra-  
218 assay analysis of the triplicates from all samples tested for Protein A-ELISA revealed that  
219 93% of the samples had a CV lower than 15% (Figure 2B). Of interest, only 2% of the  
220 samples had an CV above 30% and those were negative samples with ODs close to the  
221 lower detection limit, where small numeric variations imply in high CVs (Supplementary  
222 Figure 2).

223 To evaluate whether these ELISA methods would present cross-reaction with  
224 other pathogenic yersiniae, sera from seven rabbits previously immunized with *Y.*  
225 *pseudotuberculosis* (five) or *Y. enterocolitica* (two) strains were tested. Although the

226 average ODs from these sera were slightly higher than other negative samples (protein A:  
227 0.076 *versus* 0.014 and IgG: 0.133 *versus* 0.031), only one from the seven tested samples  
228 (*Y. enterocolitica*) presented a false-positive result for Protein A-ELISA (Figure 3 A-B).

229

### 230 **Performance of Protein A-ELISA and IgG-ELISA**

231 Taking into consideration the HA results for 98 positive and 190 negative  
232 reference samples, the analysis of protein A and IgG ELISAs performance rates revealed  
233 high sensitivity, specificity and accuracy rates for both methods (Table 1). The Protein  
234 A-ELISA test had two false-positives (one rabbit and one dog) and six false negatives  
235 (four rodents, one rabbit and one dog), with an overall sensitivity of 93.9% and specificity  
236 of 98.9%. On the other hand, the IgG-ELISA test had six false-positives (three humans,  
237 two dogs and one rabbit), with a sensitivity of 97.4% and specificity of 100% for rabbits,  
238 93% and 100% for humans and finally, 90% and 100% for dogs. Confirming these  
239 findings, the ROC curves from both protein A and IgG methods showed high area under  
240 the curve (AUC) rates. Whereas the overall and species-specific AUCs from protein A-  
241 ELISA tests remained above 0.990, AUCs from IgG-ELISA ranged from 0.930 to 0.982  
242 (Figure 3 C-D, Supplementary Figure 3).

243 The Kappa test was initially applied to measure the degree of reliability between  
244 the ELISA tests and the HA (n=288 for protein A and n=222 for IgG). Excellent  
245 agreement rates were observed in samples from all species (Table 1). Next, we included  
246 new 265 independent samples with unknown HA results (and not used in cut-offs  
247 calculation) and calculated the kappa index to measure the agreement between Protein A  
248 and IgG ELISAs (Table 2). From the 487 samples, 84 were positive in both tests, 398  
249 were negative in both tests, eight were positive for protein A but negative for IgG and  
250 five were positive for IgG but negative for protein A. Kappa coefficient for all species

251 was 0.905 (0.854-0.956), for rabbits: 0.925 (0.842-1.000), for humans: 0.914 (0.818-  
252 1.000) and for dogs: 0.850 (0.741-0.959). The p-values were < 0.05 in all tests.

253

## 254 **DISCUSSION**

255 The gold standard for plague diagnosis is the identification and isolation of the *Y.*  
256 *pestis* in bacteriological cultures from the clinical specimen. However, as proper  
257 diagnosis is often not feasible due to the acute progression of the disease and geographic  
258 isolation of cases, patients frequently receive treatment without laboratory results [2-4].  
259 Therefore, serological testing is of most importance for plague diagnosis and surveillance  
260 activities, as it can detect not only active infections in humans and other hosts, but also  
261 retrospectively identify individuals exposed to the bacteria [9,10]. In this scenario,  
262 serological surveillance must consider a wide variety of mammals to be tested, such as  
263 rodents and other small mammals, domestic (dogs and cats) and wild carnivores that prey  
264 on rodents [5,12,21,22,24].

265 Here, we describe a Protein A-based approach designed to overcome some  
266 limitations faced by routine laboratories when using other serological methods, such as  
267 HA (subjective interpretation, high consumption of antigen, perishable reagents) and  
268 conventional ELISA (requires specific IgG-peroxidase conjugate, cut-off calculation and  
269 positive controls for each species). While the protocol here established requires 750 ng  
270 of F1 antigen per tested sample (using triplicates), HA spends 20,000 ng of F1 per tested  
271 sample (considering the standard eight dilutions according to Chu [10], resulting in the  
272 use of approximately twenty-seven times more antigen per sample. This difference can  
273 be particularly relevant for plague diagnosis given the complexity and costs of producing  
274 and purifying F1 from extensive *Y. pestis* culturing in biosafety level 3 (BSL3)  
275 laboratories [23].

276 Throughout a broad range of host species hereby tested, the Protein A-ELISA  
277 method showed high sensitivity, specificity and reproducibility rates even with a single  
278 cut-off value for all species. Corroborating these findings, the analysis of the ROC curve  
279 showed AUCs above 0.990 in all groups tested in protein A-ELISA, while AUCs from  
280 IgG-ELISA ranged from 0.930 to 0.982. The Cohen's Kappa test revealed high agreement  
281 rates for this protocol when compared to HA (n=288) and IgG-ELISA (n=487). Since  
282 human cases of plague have not been reported in Brazil since 2005, we were not able to  
283 estimate positive/negative predictive values [25].

284 Remarkably, we observed a good correlation between ODs from Protein A and  
285 anti-IgG, with higher positive/negative OD ratios in the Protein A-ELISA test, which  
286 allows a safer window of opportunity for cut-off determination between positive and  
287 negative samples. Of note, little cross-reaction was observed in sera from rabbits  
288 immunized with other pathogenic yersiniae. Interestingly, whilst negative samples  
289 showed low background signals in Protein A, anti-rabbit and anti-humans IgG conjugates,  
290 a rather marked background in anti-dog IgG conjugate was observed. This could be  
291 associated to the non-specific agglutination routinely observed in sera from dogs in  
292 diagnosis by HA.

293 Although remaining detectable in humans for several years after infection,  
294 antibodies against *Y. pestis* can only be detected from the fifth day of infection by HA  
295 and from the eighth day by IgG-ELISA [15,26,27]. Previous studies demonstrate that in  
296 addition to its universal affinity for immunoglobulins (IgG) from almost all mammals,  
297 protein A can also bind to IgA and IgM and possibly, detect infections in earlier stages of  
298 infections, before serum conversion to IgG [19]. However, this hypothesis is yet to be  
299 tested in the context of serodiagnosis of plague.



- 325 4. Stenseth NC, Atshabar BB, Begon M, et al. Plague: past, present and future. PLoS  
326 Medicine 2008; 5:9-13.
- 327 5. Mahmoudi A, Krytufek B, Sludsky A, et al. Plague reservoir species throughout  
328 the world. Int Zool 2020; 0:1-14.
- 329 6. Gage KL. Factors Affecting the Spread and Maintenance of Plague. Advances in  
330 *Yersinia* Research Springer 2012; 954:79-94.
- 331 7. Jones SD, Atshabar B, Schmid BV, Zuk M, Amramina A, Stenseth NC. Living  
332 with plague: Lessons from the Soviet Union's antiplague system. PNAS 2019;  
333 116:9155-163.
- 334 8. Mead PS. Plague in Madagascar - A Tragic Opportunity for Improving Public.  
335 Health. N Engl J Med 2018; 378:106-8.
- 336
- 337 9. Denis DT, Gage KL, Gratz N, Poland JD, Tikhomirov E. Plague manual:  
338 Epidemiology, Distribution, Surveillance and Control. WHO 1999. Available at:  
339 [https://www.who.int/csr/resources/publications/plague/whocdscsredc992a.pdf?u](https://www.who.int/csr/resources/publications/plague/whocdscsredc992a.pdf?ua=1)  
340 [a=1](https://www.who.int/csr/resources/publications/plague/whocdscsredc992a.pdf?ua=1). Accessed 25 February 2021.
- 341 10. Chu M. Laboratory Manual of Plague Diagnostic Tests. Centers for Disease  
342 Control and Prevention, World Health Organization 2000.
- 343 11. Demeure CE, Dussurget O, Guillem MF, Le Guern AS, Savin C, Pizarro-Cerdá J.  
344 *Yersinia pestis* and plague: an updated view on evolution, virulence determinants,  
345 immune subversion, vaccination, and diagnostics. Gen Imm 2019; 20:357-70.
- 346 12. Esamaeili S, Azadmanesh K, Naddaf SR, Rajerison M, Carniel E, Mostafavi E.  
347 Serologic survey of plague in animals, Western Iran. Emerg Infect Dis 2013;  
348 19:1549-51.

- 349 13. Almeida AMP, Ferreira LCS. Evaluation of three serological tests for the  
350 detection of human plague in northeast Brazil. Mem Inst Oswaldo Cruz 1992;  
351 87:87-92
- 352 14. Rajerison M, Darteville S, Ralafiarisoa LA, et al. Development and Evaluation of  
353 Two Simple, Rapid Immunochromatographic Tests for the Detection of *Yersinia*  
354 *pestis* Antibodies in Humans and Reservoirs. PLoS Negl Trop Dis 2009; 3:e421.
- 355 15. Rasoamanana B, Leroy F, Boisier P, Rasolomaharo M, Buchy F, Carniel E,  
356 Chanteau S. Field evaluation of an immunoglobulin G anti-F1 enzyme-linked  
357 immunosorbent assay for serodiagnosis of human plague in Madagascar. Clin  
358 Diagn Lab Immunol 1997; 4:587-91.
- 359 16. Shepherd AJ, Leman PA, Hummitzsch DE, Swanepoel R. A comparison of  
360 serological techniques for plague surveillance. Trans R Soc Trop Med Hyg 1984;  
361 78:771-73.
- 362 17. Baril L, Vallès X, Stenseth NC, et al. Can we make human plague history? A call  
363 to action. BMJ Global Health 2019; 4:e001984.
- 364 18. Goudswaard J, Vander Donk JA, Noordzij A, Van Dam RH, Vaerman JP. Protein  
365 A reactivity of various mammalian immunoglobulins. Scand J Immunol 1978;  
366 8:21-8.
- 367 19. Kelly PJ, Tagwira M, Matthewman L, Mason PR, Wright EP. Reactions of sera  
368 from laboratory, domestic and wild animals in Africa with protein A and a  
369 recombinant chimeric protein AG. Comp Immunol Microbiol Infect Dis 1993;  
370 16:299 -305.
- 371 20. Surolia A, Pain D, Khan MI. Protein A: nature's universal anti-antibody. TIBS  
372 1982; 74-6.

- 373 21. Costa ECV, Sobreira M, Leal NC, Almeida AMP. Rodents and other small  
374 mammal reservoirs in plague foci in northeastern Brazil. *Journal of Infection in*  
375 *Developing Countries* 2017; 11:426-30.
- 376 22. Sousa LLF, Alencar CH, Almeida AMP, Cavalcanti LPG. Seroprevalence and  
377 spatial distribution dynamics of *Yersinia pestis* antibodies in dogs and cats from  
378 plague foci in the State of Ceará, Northeastern Brazil. *Revista da Sociedade*  
379 *Brasileira de Medicina Tropical* 2017; 50:769-76.
- 380 23. Tavares DHC, Bezerra MF, Magalhães F et al. A new recombinant F1 antigen as  
381 a cost and time-effective tool for plague diagnosis. *J Microbiol Meth* 2020;  
382 172:105903.
- 383 24. Bevins SN, Baroch JA, Nolte DL, Zhang M, Hongxuan HE. *Yersinia pestis*:  
384 examining wildlife plague surveillance in China and the USA. *Integrative*  
385 *Zoology* 2012; 7:99-109.
- 386 25. Almeida AMP, Sobreira M, Leal NC, Tavares C. Does the Plague Still Threaten  
387 Us? *Rev Soc Bras Med Trop* 2020; 53:e20190136.
- 388 26. Andrianaivoarimanana V, Iharisoa AL, Rahalison L, et al. Short- and long-term  
389 humoral immune response against *Yersinia pestis* in plague patients, Madagascar.  
390 *BMC Infectious Diseases* 2020; 20:822.
- 391 27. Butler T and Hudson BW. The serological response to *Yersinia pestis* infection.  
392 *Bull World Health Organ* 1977; 55:39-42.

393

394

395

396

397



398

399

400

401

402

403

404

405

406

407

#### 408 **FIGURES LEGENDS**

409 **Figure 1. Standardization of Protein A-ELISA.** F1 antigen purified from the A1122 *Y.*  
410 *pestis* strain in culture (A). Three concentrations of F1 antigen (250 ng, 375 ng and 500  
411 ng) were tested. The assay was optimized at the concentration of 250 ng of F1 antigen per  
412 well (B). Graph with the optical densities from titrated sera in different species (C).

413

414 **Figure 2. Linearity and precision of Protein A-ELISA.** Good correlation  
415 (Pearson=0.97) was observed between the Protein A and IgG ELISA tests using control  
416 rabbit sera (n = 81). Dashed lines represent the 95% confidence interval and the white  
417 datapoint, an outlier samples excluded from correlation analysis (A). From the total 553  
418 samples tested for Protein A-ELISA, 88% had a coefficient of variation (CV) of the  
419 triplicates lower than 10% and 93% of the samples had a CV lower than 15%. The line  
420 shows the cumulative percentage of samples within the respective CV level and the bars  
421 show the absolute amounts of samples in each interval of CV value (B).

422

423 **Figure 3. Validation of the diagnosis of plague by Protein A-ELISA and IgG-ELISA**  
424 **in HA-tested sera.** Comparison between ODs from positive and negative sera for Protein  
425 A-ELISA. The cut-off in Protein A-ELISA was 0.130 for all species **(A)**. For IgG-ELISA,  
426 the cut-offs were 0.258 (rabbits), 0.320 (humans) and 0.573 (dogs). All sera were  
427 previously tested for hemagglutination **(B)**. Area under the curve (AUC) for protein A  
428 **(C)** and IgG **(D)** conjugates. AUC values close to 1.0 indicate good test performance.

429

430 **Supplementary Figure 1. Standardization of IgG-ELISA.** Four distinct titers were  
431 tested for each anti-IgG conjugates in triplicate for one positive and one negative serum  
432 from each species. Antigen concentration and sample titer were the same from the  
433 previously established in the Protein A-ELISA assay.

434

435 **Supplementary Figure 2. Coefficient of variation in Protein A-ELISA according to**  
436 **the average OD.** The majority of the samples tested for Protein A-ELISA (n=553) had  
437 triplicates with low CVs. Higher variation was found in negative samples, with the ODs  
438 close to the lower detection limit, where small numeric variations implies in high CVs.

439

440 **Supplementary Figure 3. ROC curves for Protein A-ELISA.** Stratified ROC curves  
441 and area under the curve (AUC) for protein A-ELISA according to each evaluated  
442 species.

**A**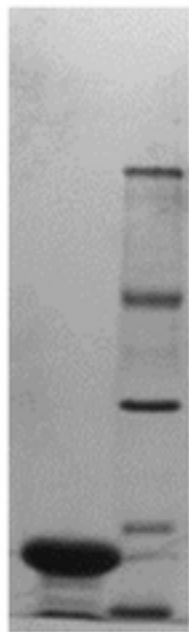**B**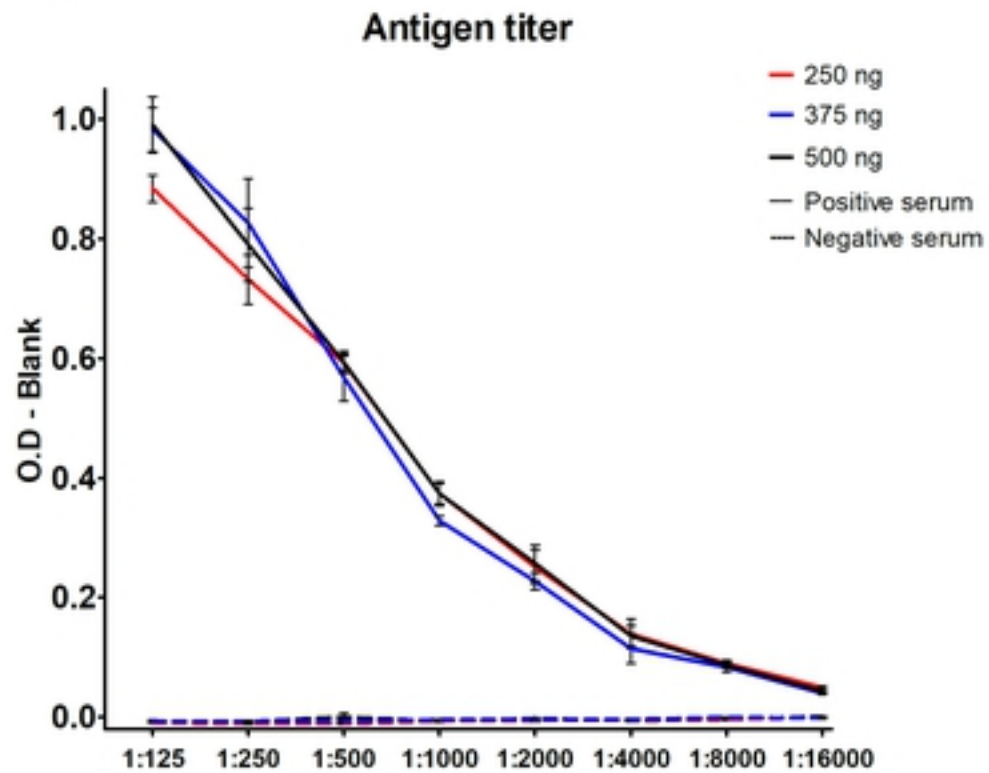**C**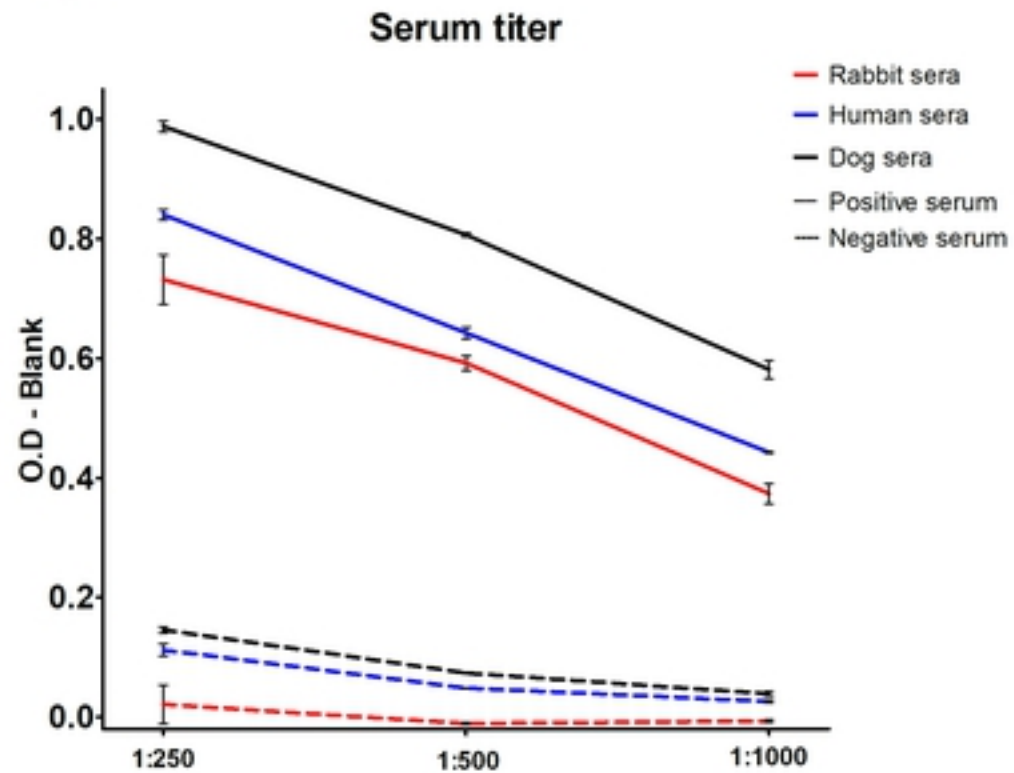

**A**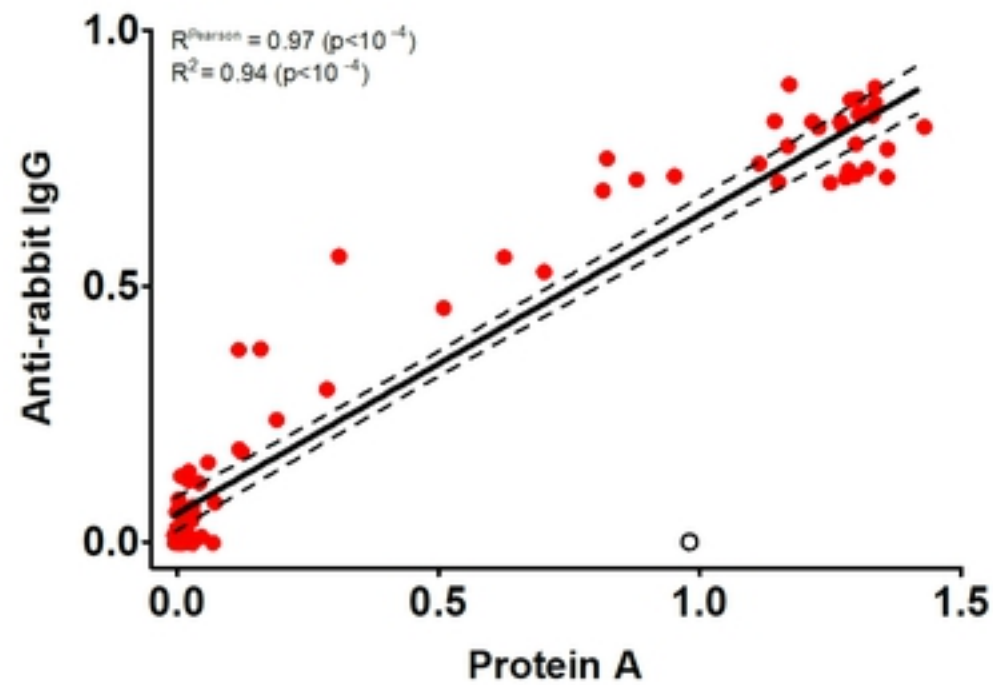**B**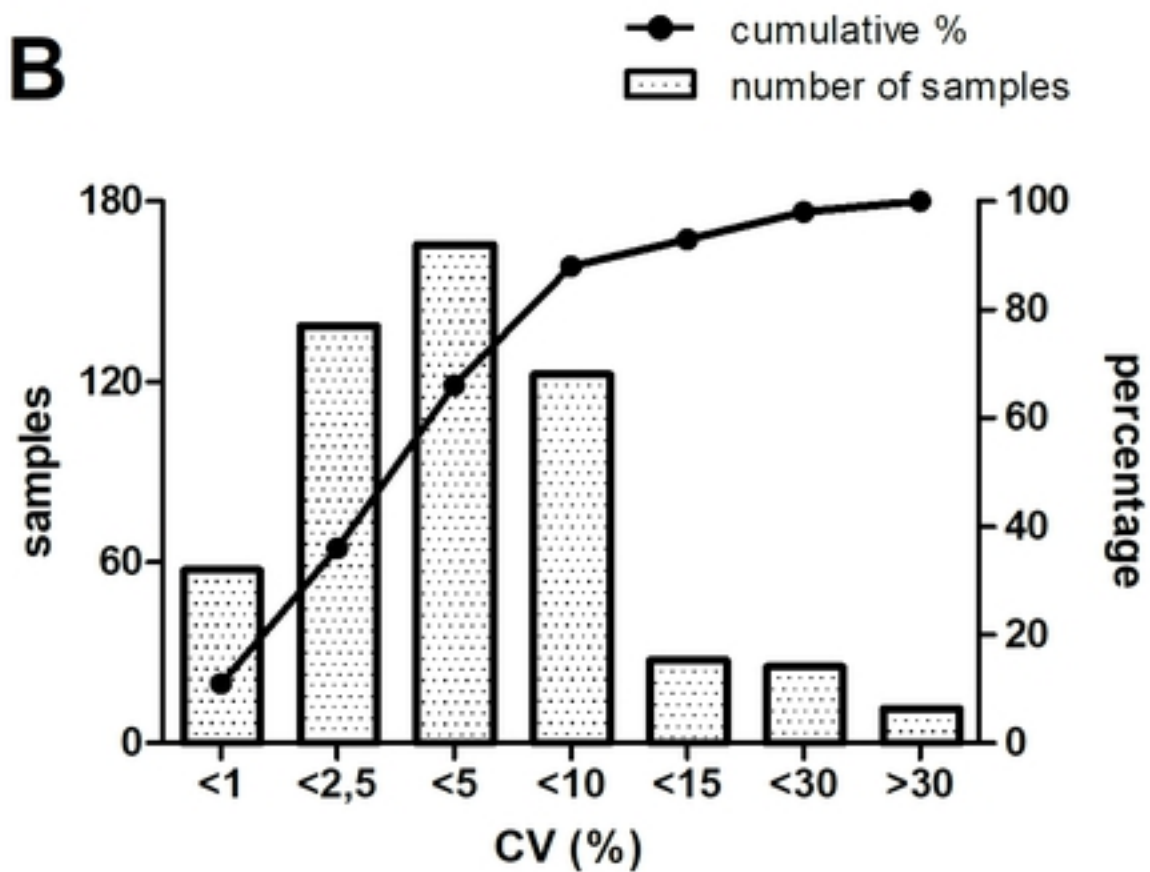

**A** Protein A-ELISA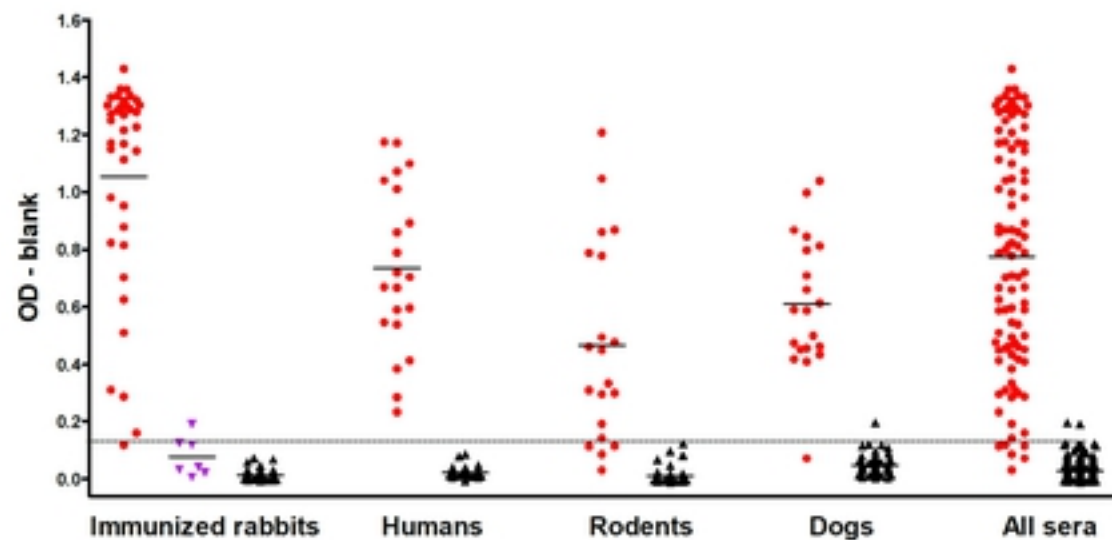**B** IgG-ELISA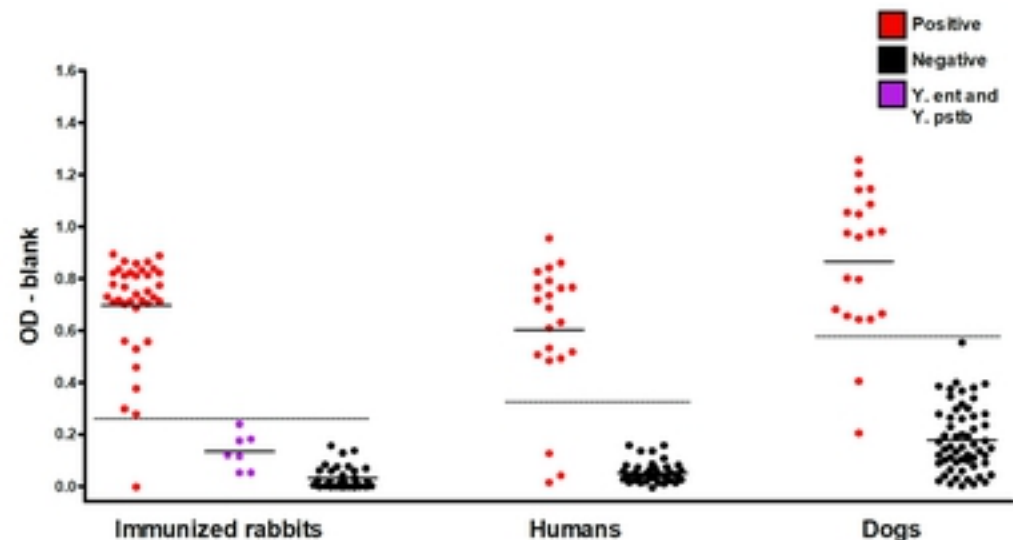**C** Protein A-ELISA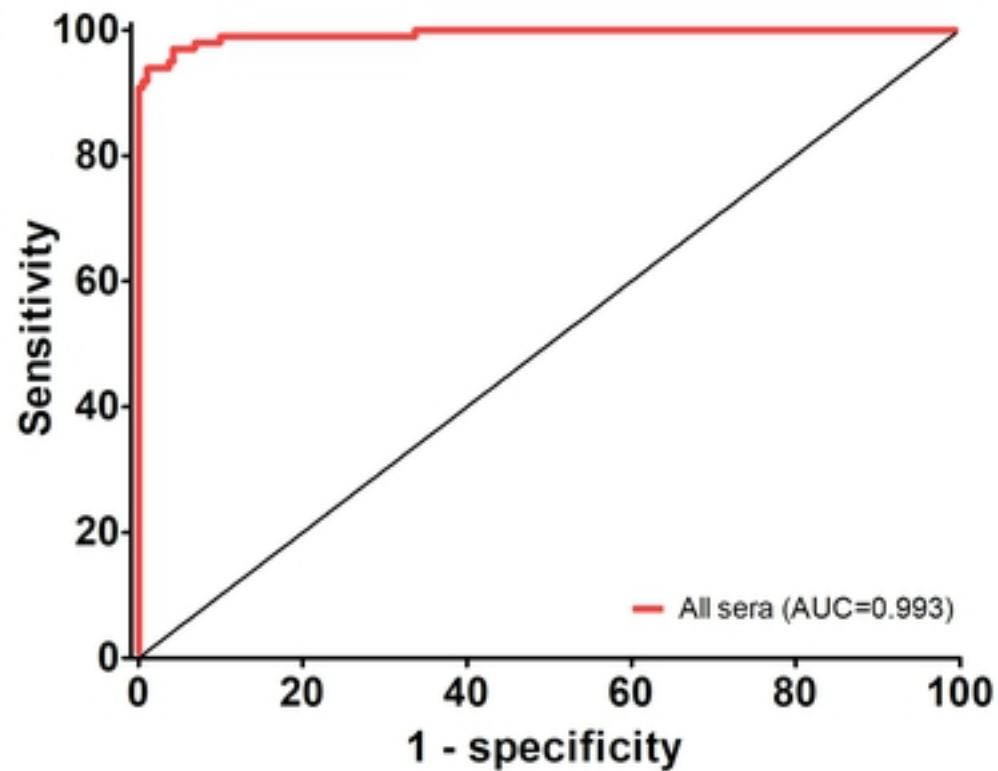**D** IgG-ELISA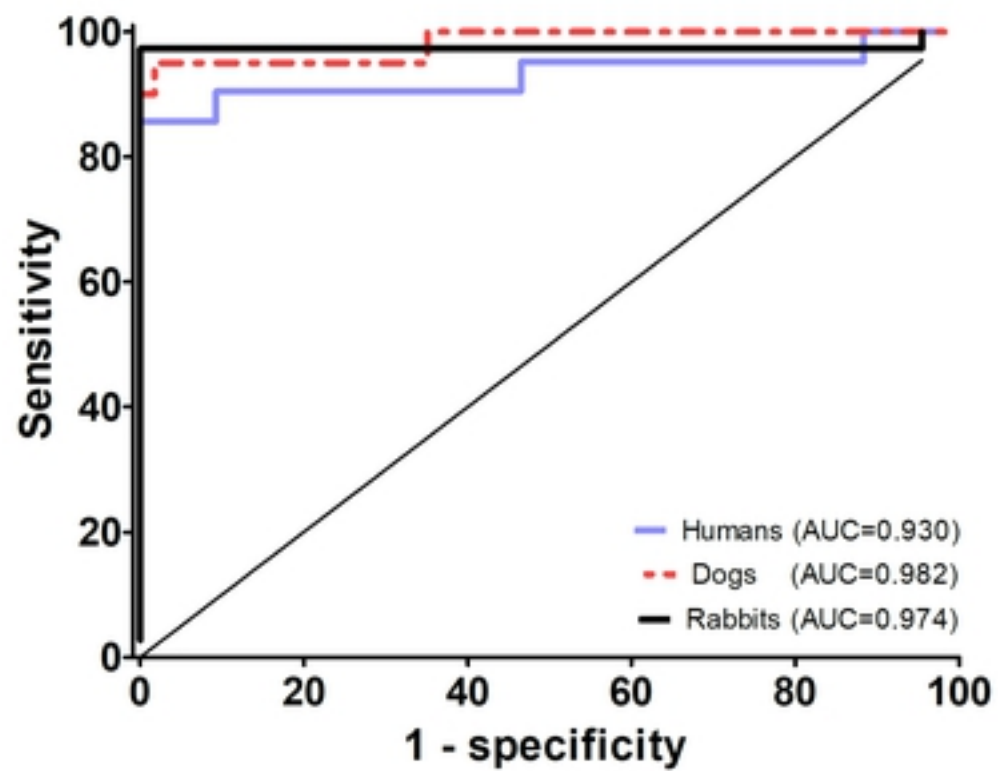

# Conjugate titer (IgG)

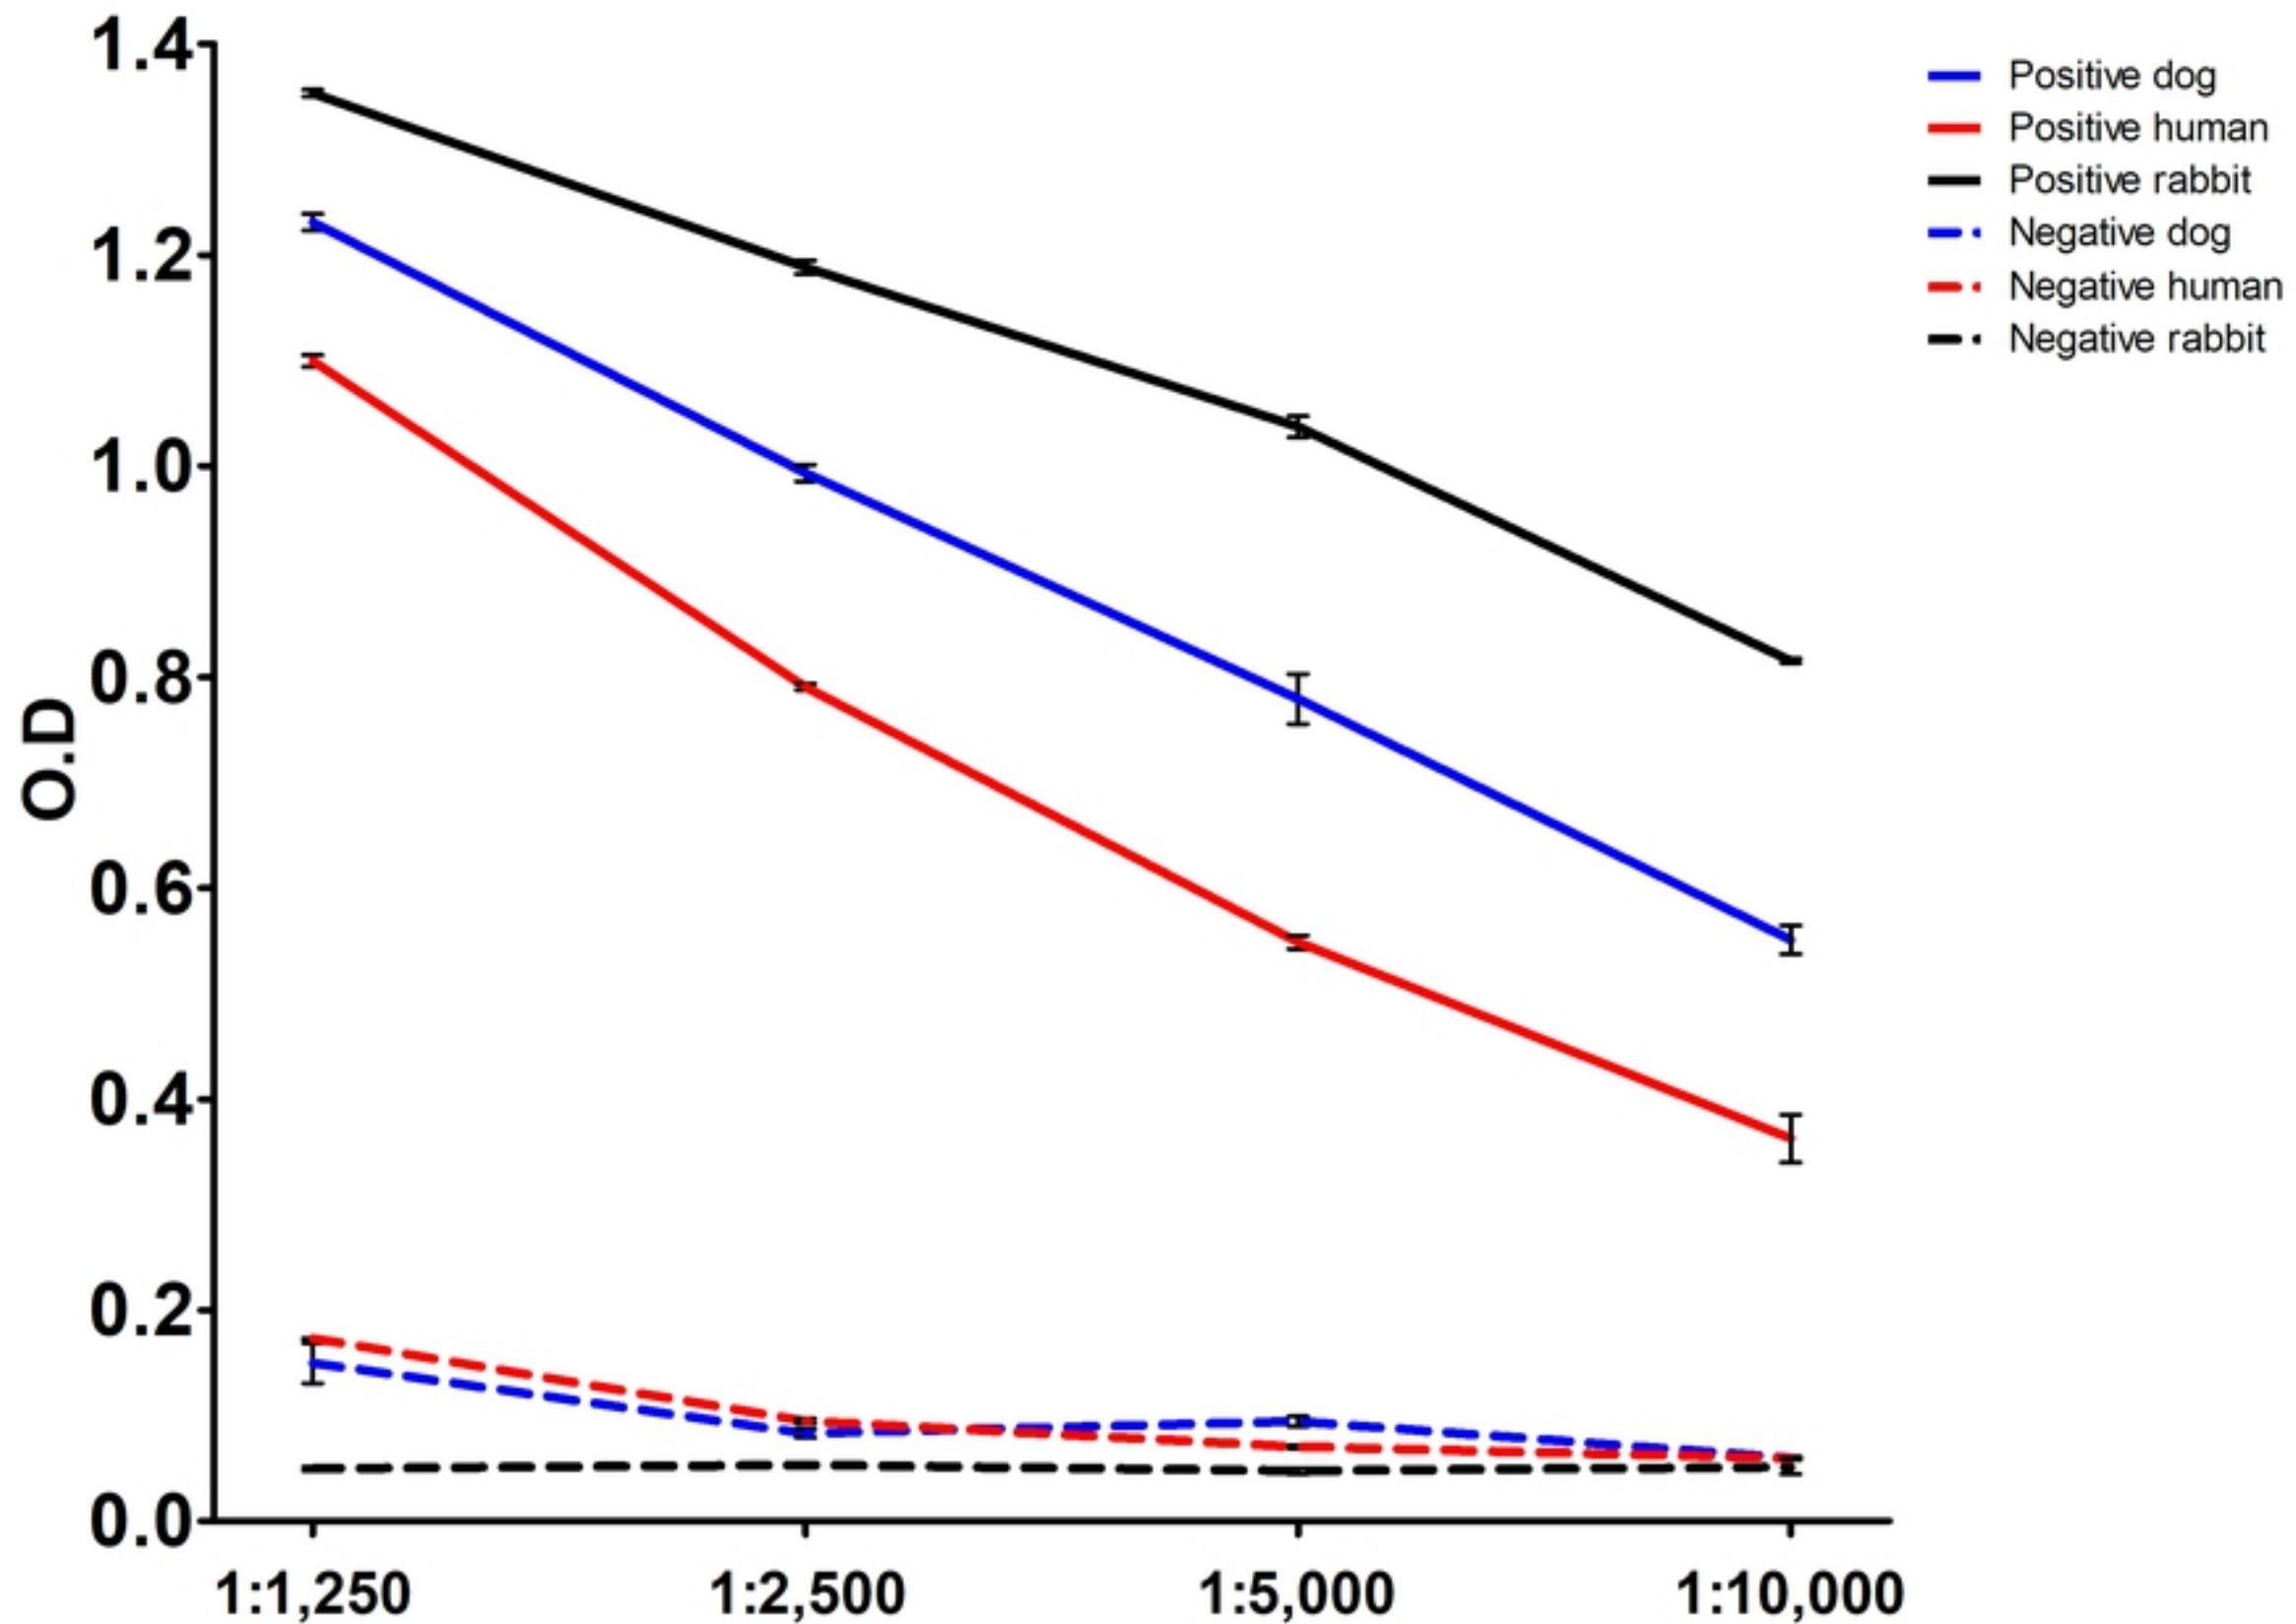

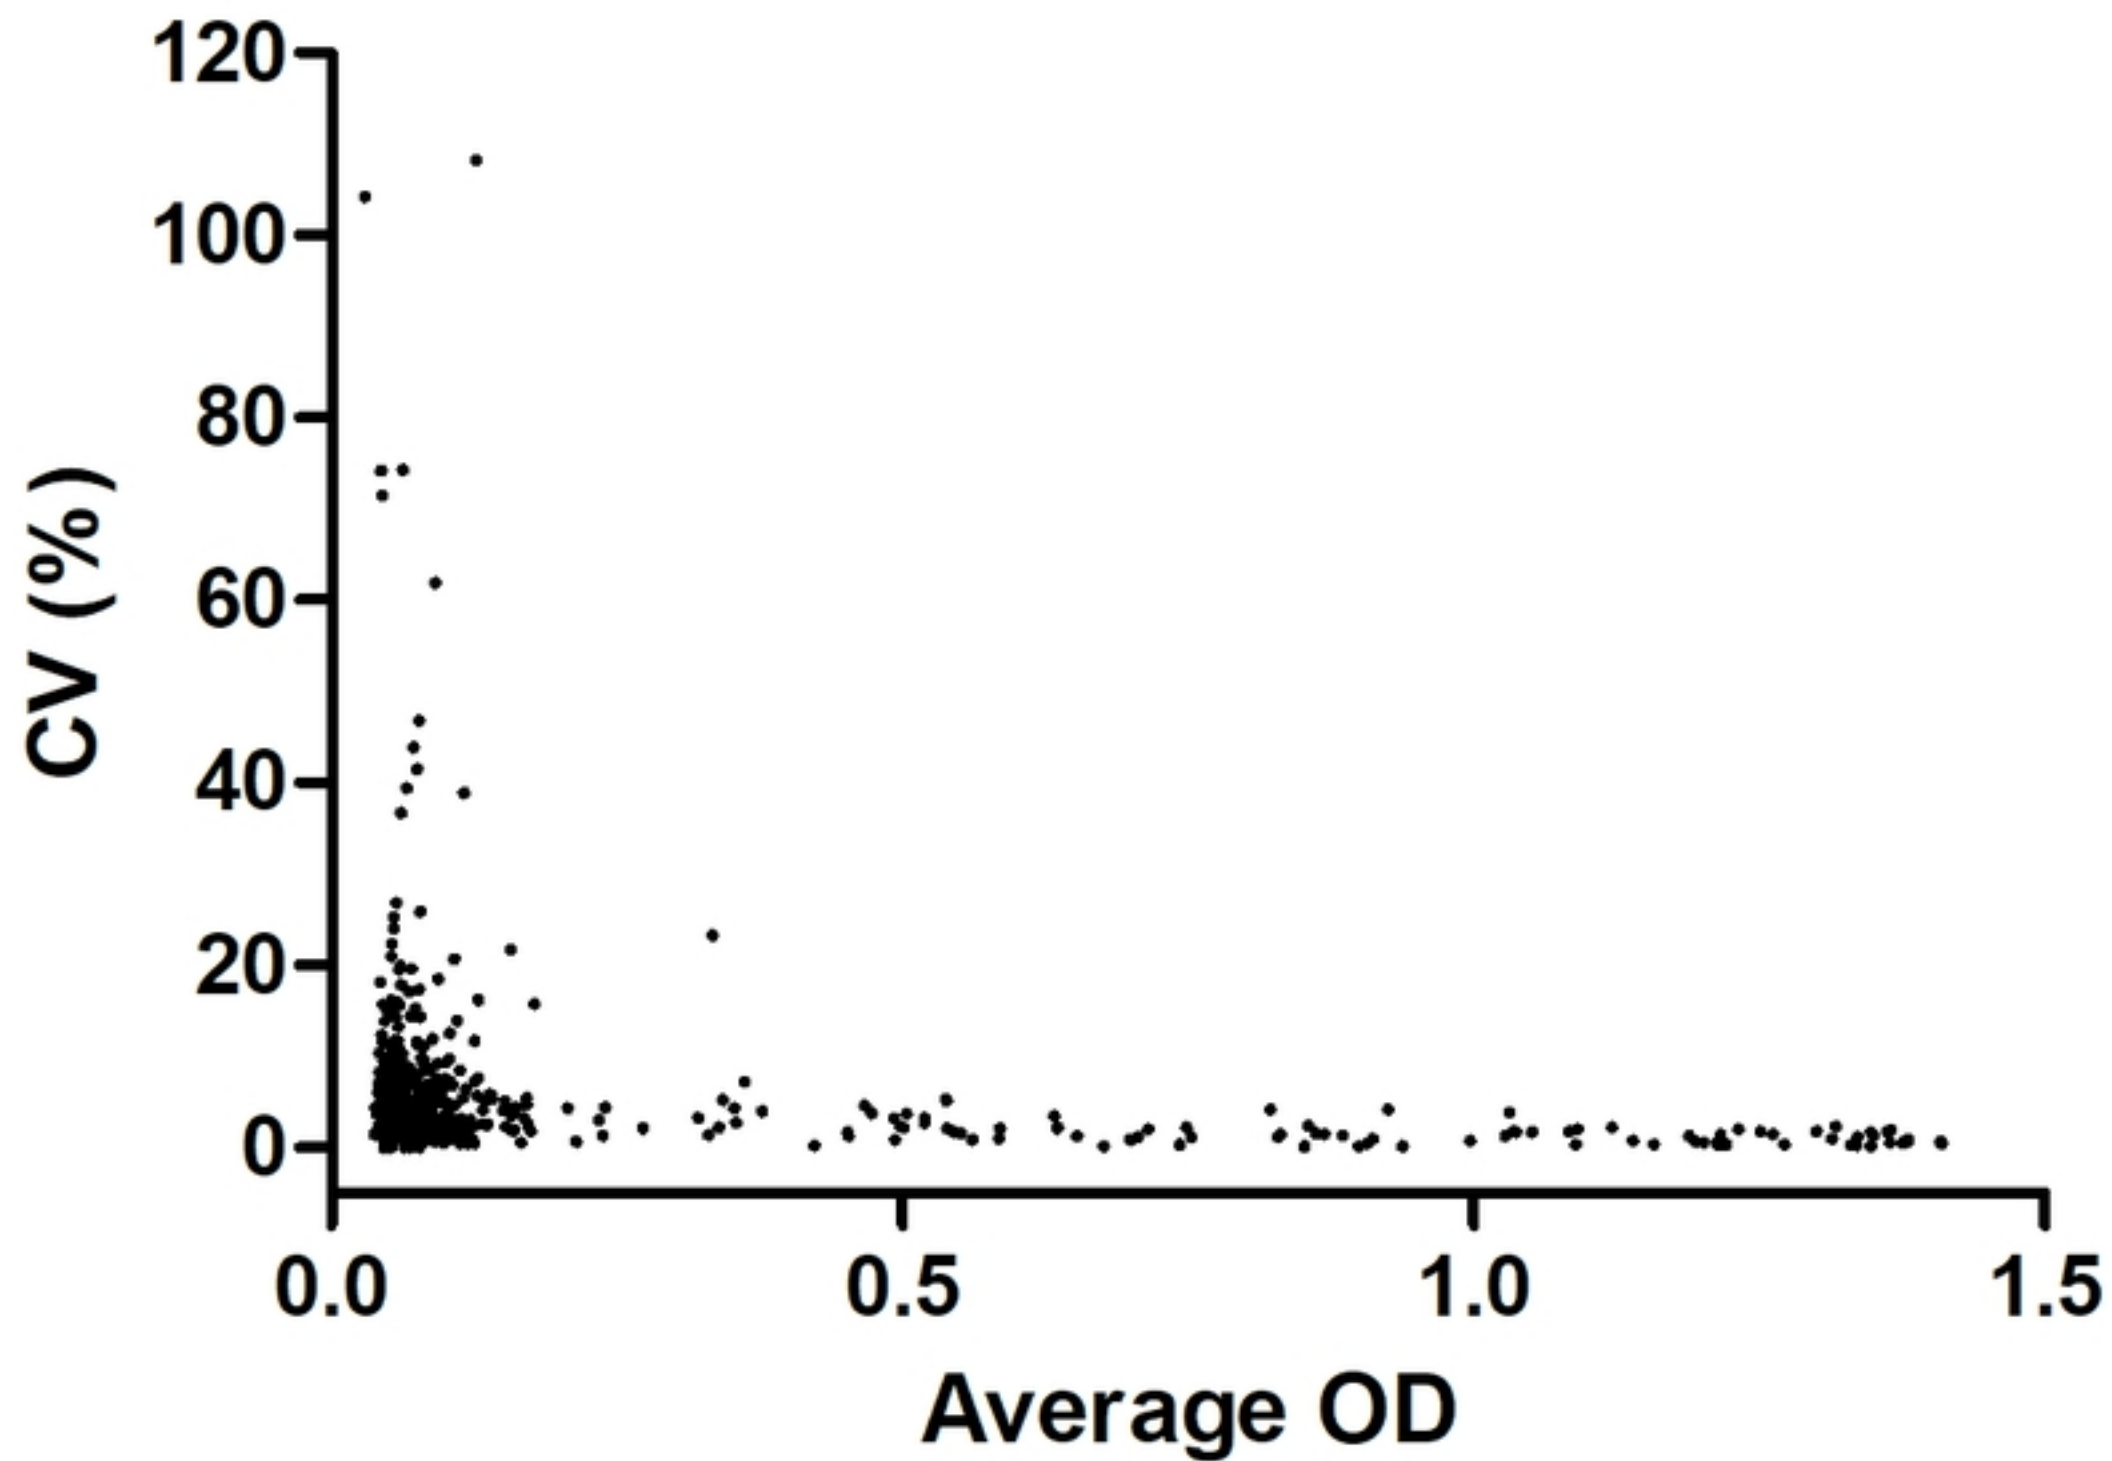

Supplementary Figure



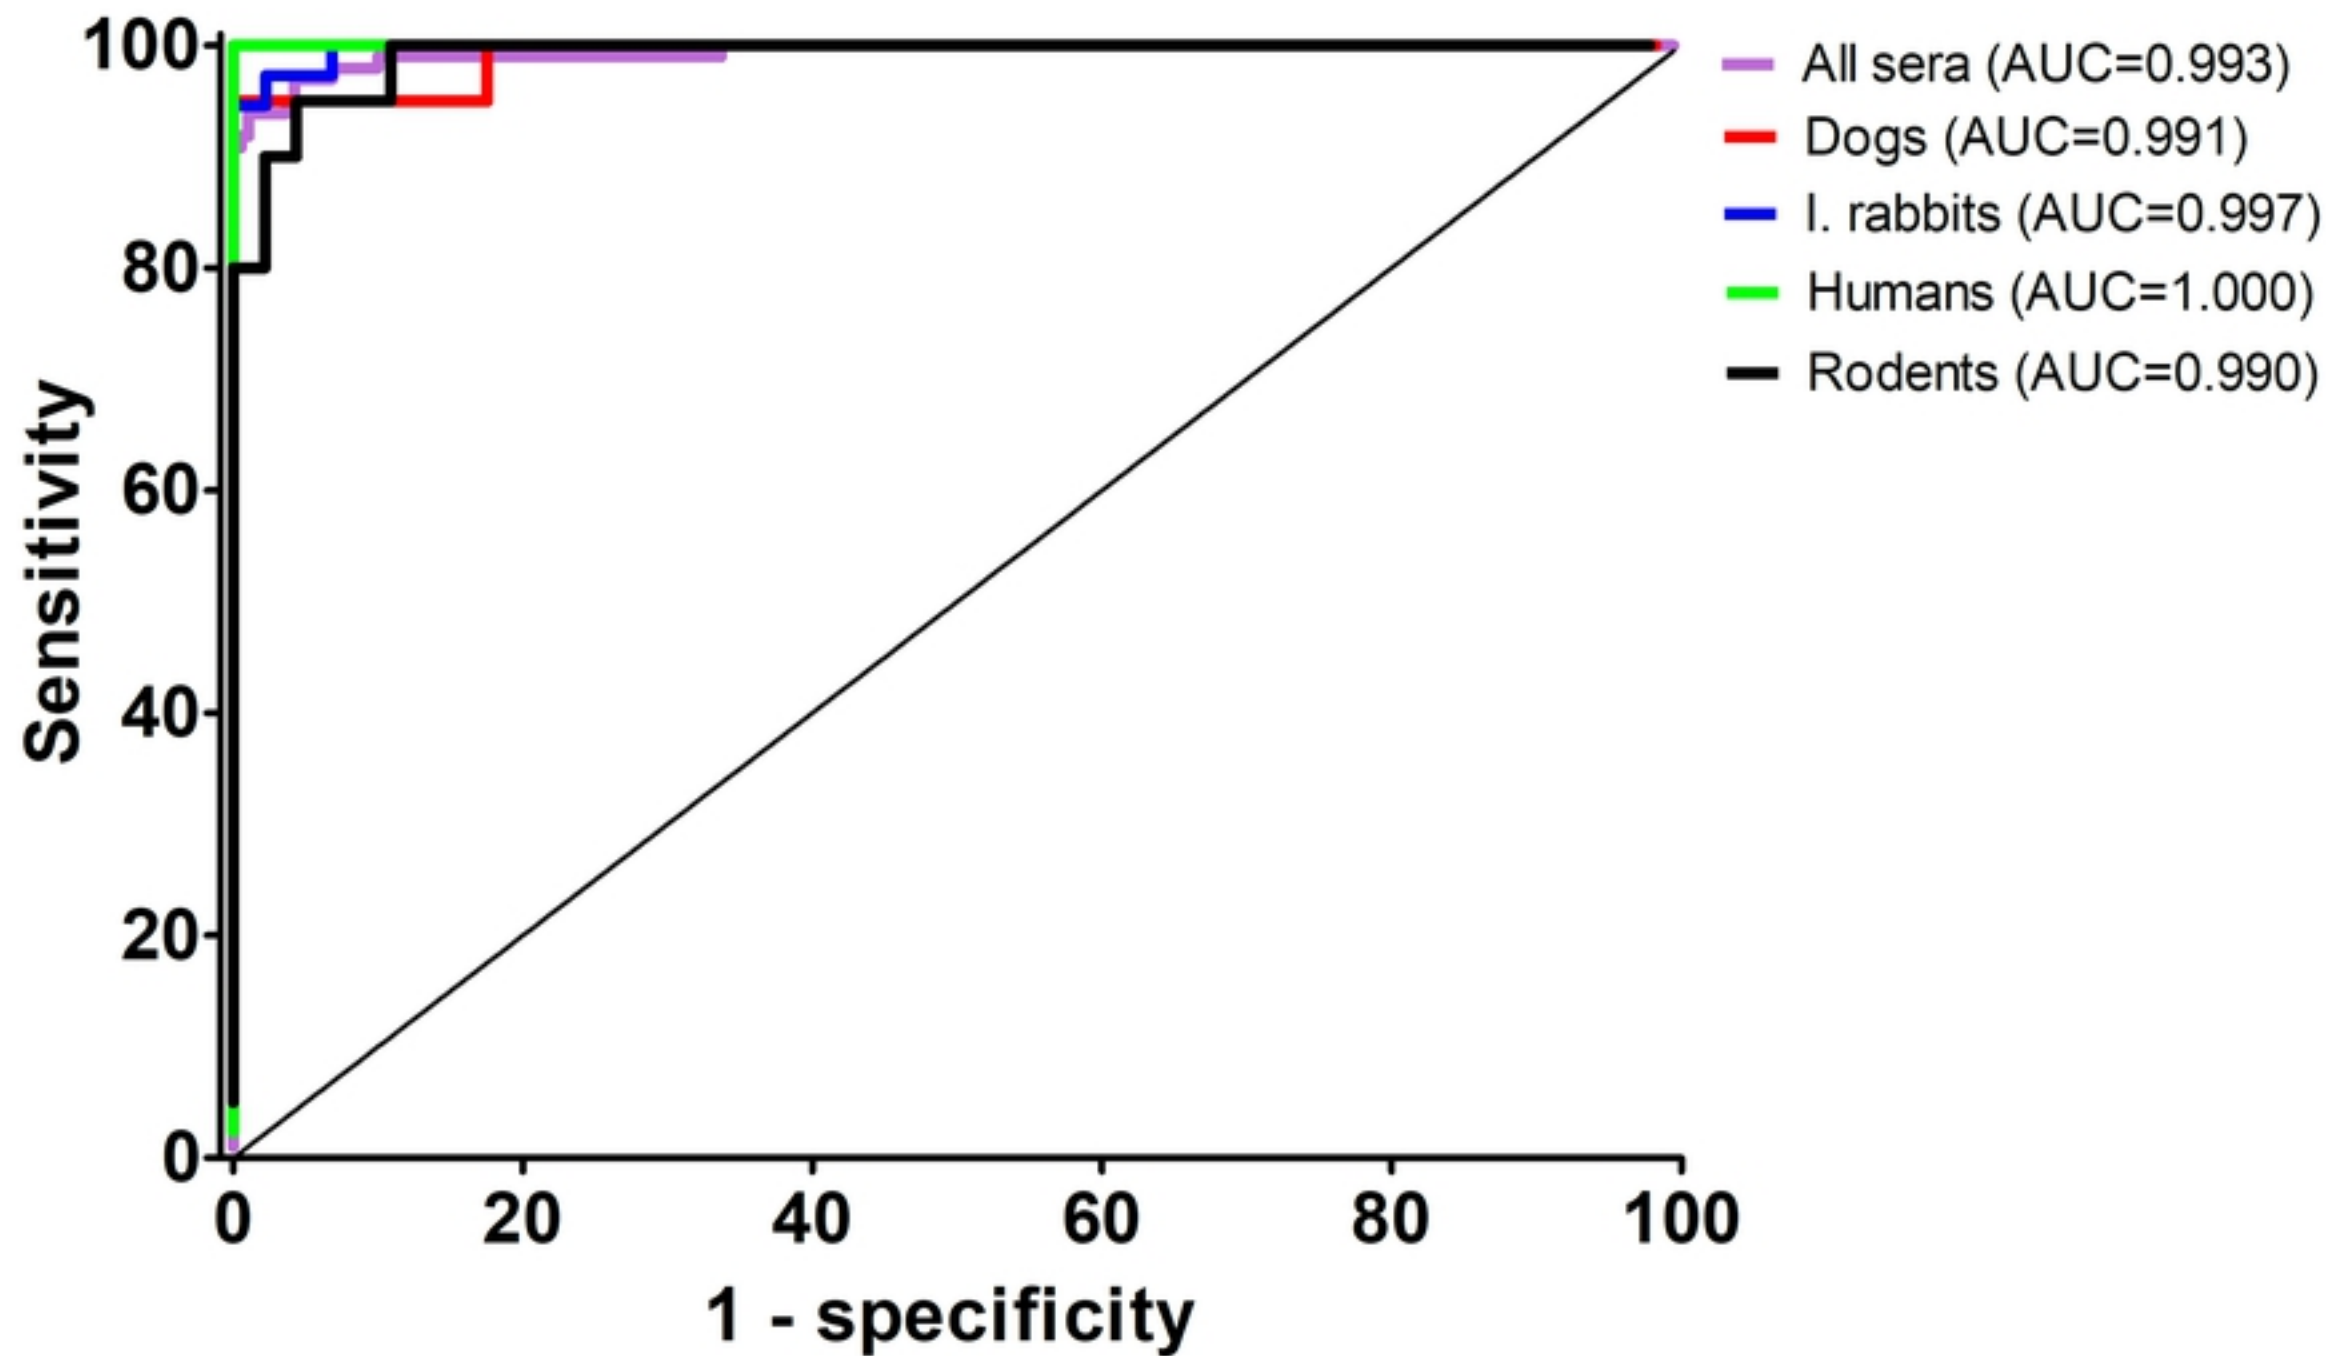

Supplementary Figure
